# Supplementary material
Source: Springer Nature journal article supplement (https://www.springermedizin.de/resource/supplementary/12957_2011_904_MOESM3_ESM.pdf/9565774)

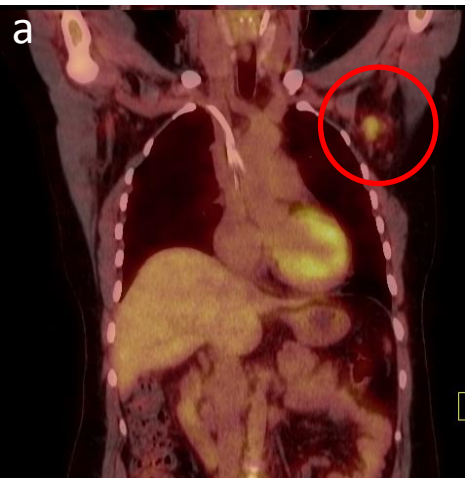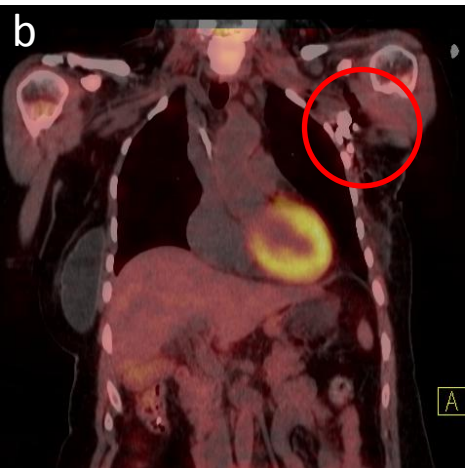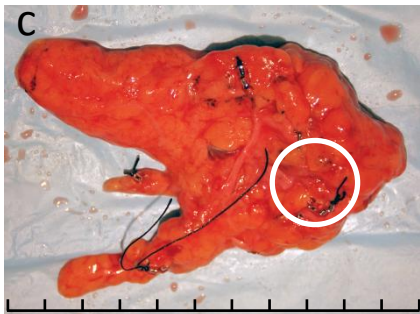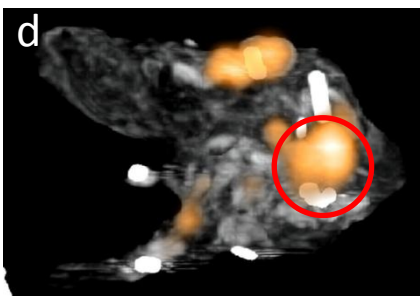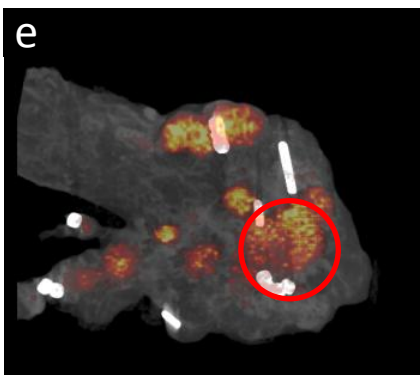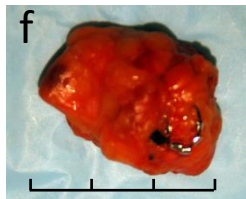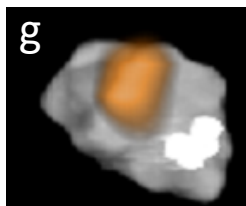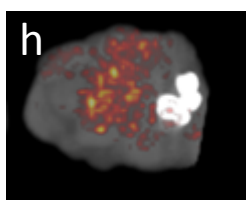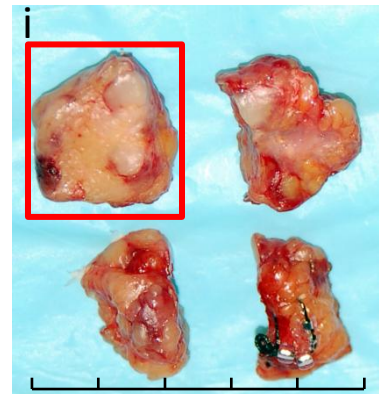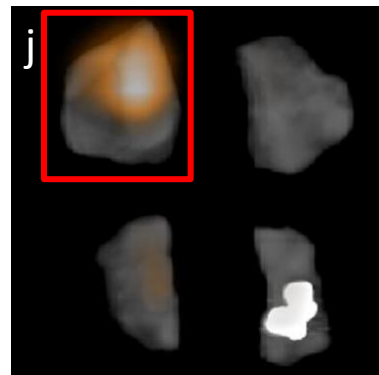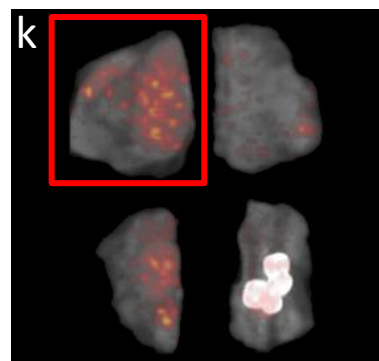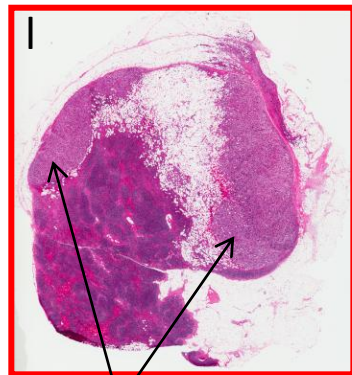

tumor

Supplement: MOESM3 [file 9565774]
